# Supplementary material for: Comparing the performance of FA, DFA and DMA using different synthetic long-range correlated time series
Source: PubMed Central journal article supplement — Sci Rep. 2012 Nov 12;2:835. doi: 10.1038/srep00835 (PMC3495288; doi:10.1038/srep00835), 2012-11-12
Supplement: srep00835-s1.pdf [file srep00835-s1.pdf]

# Comparing the performance of FA, DFA and DMA using different synthetic long-range correlated time series

Ying-Hui Shao,<sup>1,2</sup> Gao-Feng Gu,<sup>1,2</sup> Zhi-Qiang Jiang,<sup>1,2</sup> Wei-Xing Zhou,<sup>1,2,3,\*</sup> and Didier Sornette<sup>4,5,†</sup>

<sup>1</sup>*School of Business, East China University of Science and Technology, Shanghai 200237, China*

<sup>2</sup>*Research Center for Econophysics, East China University of Science and Technology, Shanghai 200237, China*

<sup>3</sup>*School of Science, East China University of Science and Technology, Shanghai 200237, China*

<sup>4</sup>*Department of Management, Technology and Economics, ETH Zurich, Zurich, Switzerland*

<sup>5</sup>*Swiss Finance Institute, c/o University of Geneva, Geneva, Switzerland*

---

\* wxzhou@ecust.edu.cn

† dsornette@ethz.ch

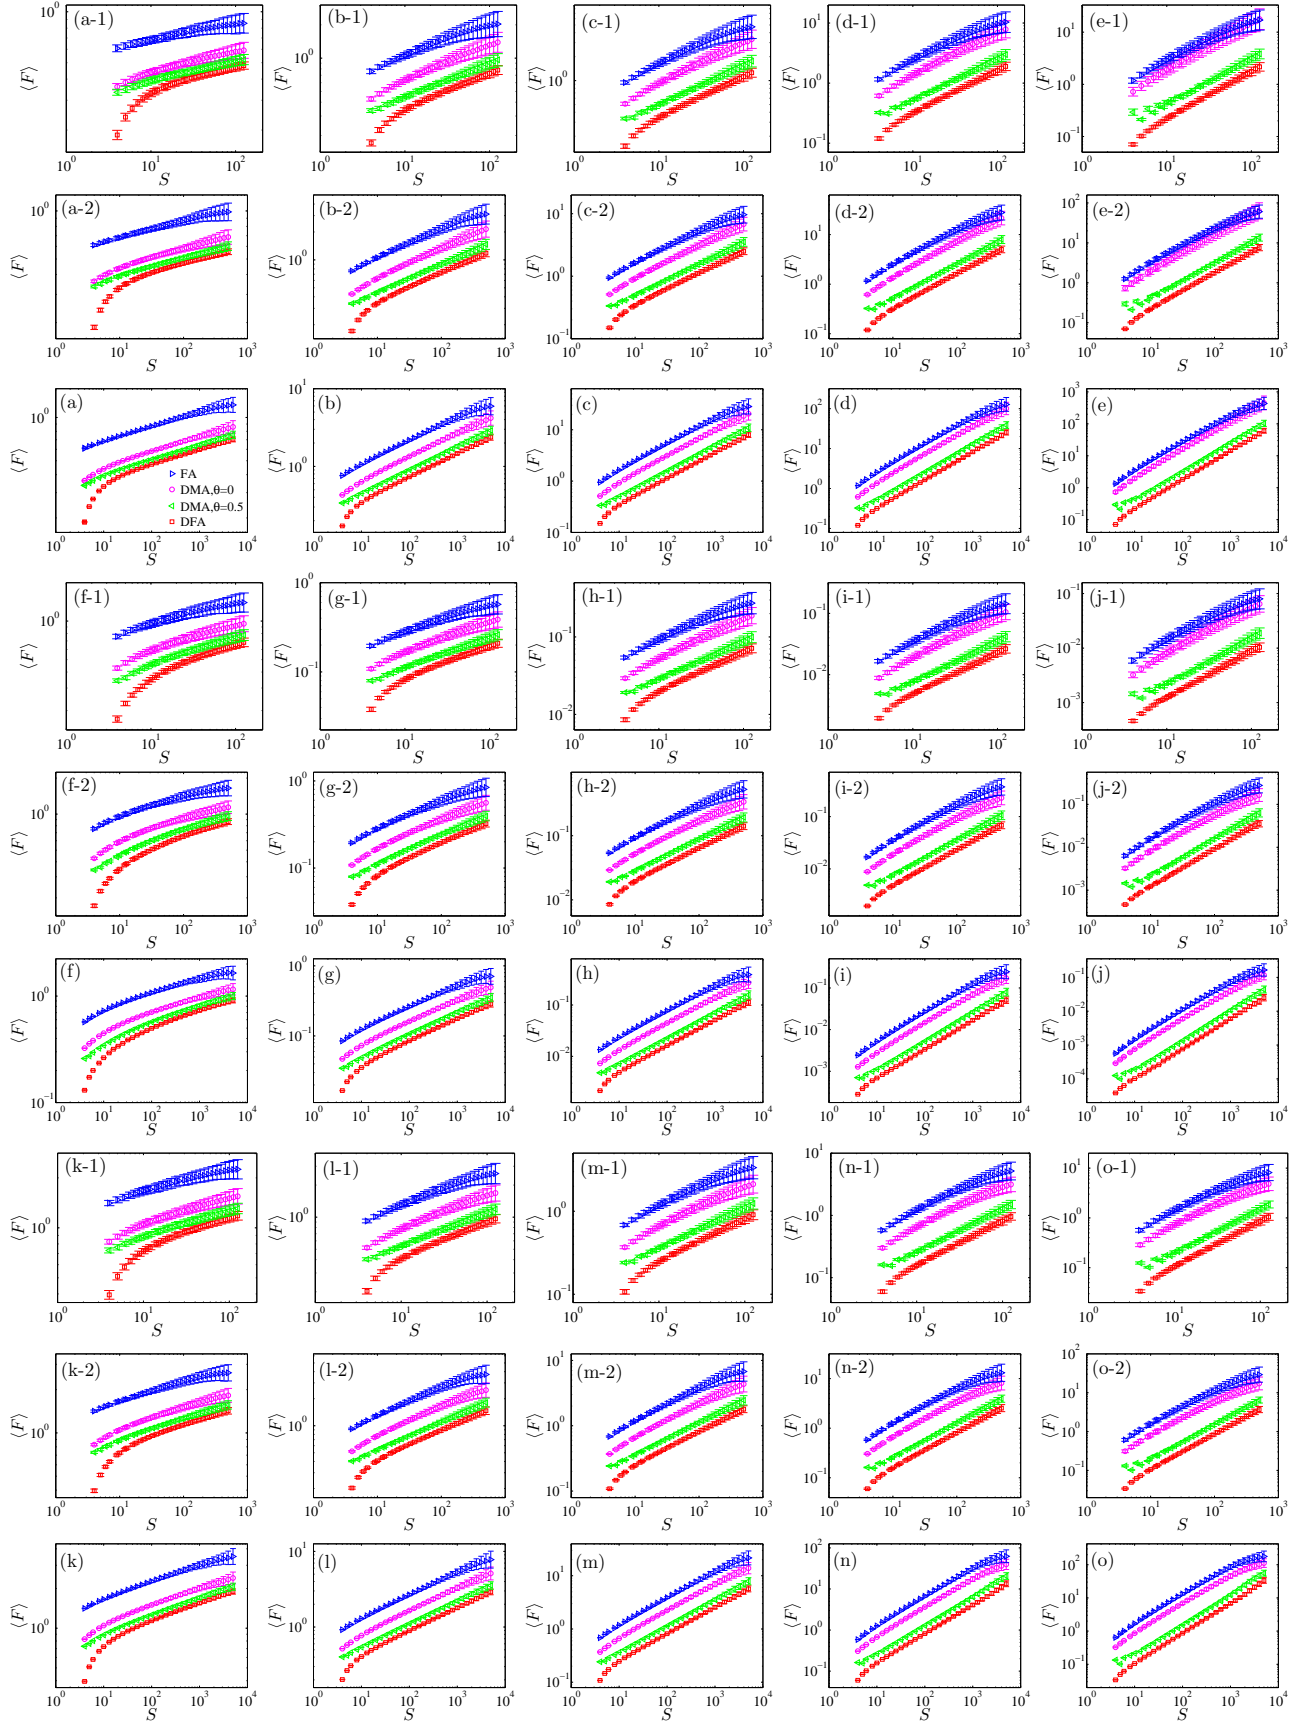

FIG. 1. Comparing plots of  $\langle F \rangle$  against  $s$ . The plots labeled (a)-(o) are the same as in the paper where the length of time series is 20000, the plots labeled with (a-1) to (o-1) are the results where the length of time series is 500, and the plots labeled with (a-2) to (o-2) are the results where the length of time series is 2000.

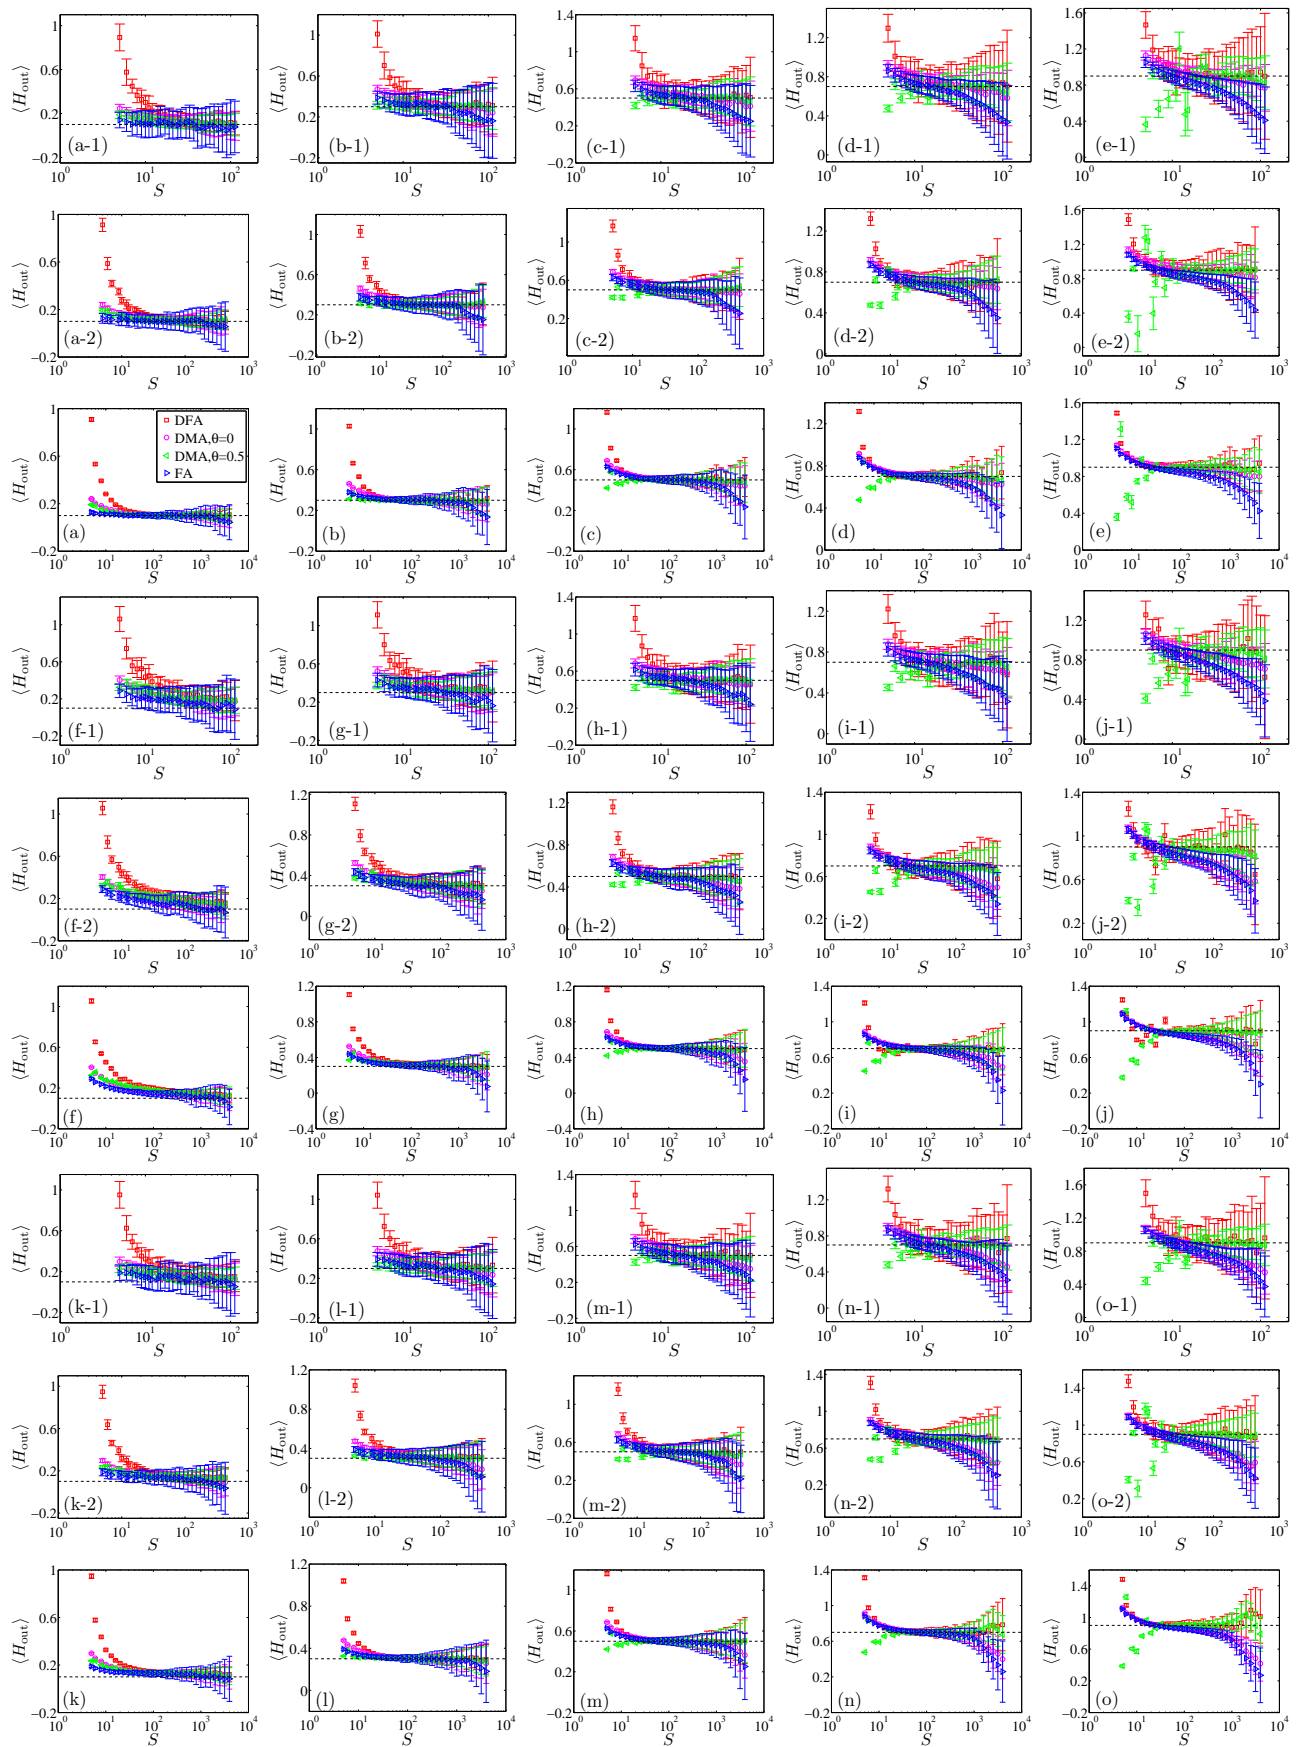

FIG. 2. Comparing local slopes of the fluctuation functions. The plots labeled (a)-(o) are the same as in the paper where the length of time series is 20000, the plots labeled with (a-1) to (o-1) are the results where the length of time series is 500, and the plots labeled with (a-2) to (o-2) are the results where the length of time series is 2000.

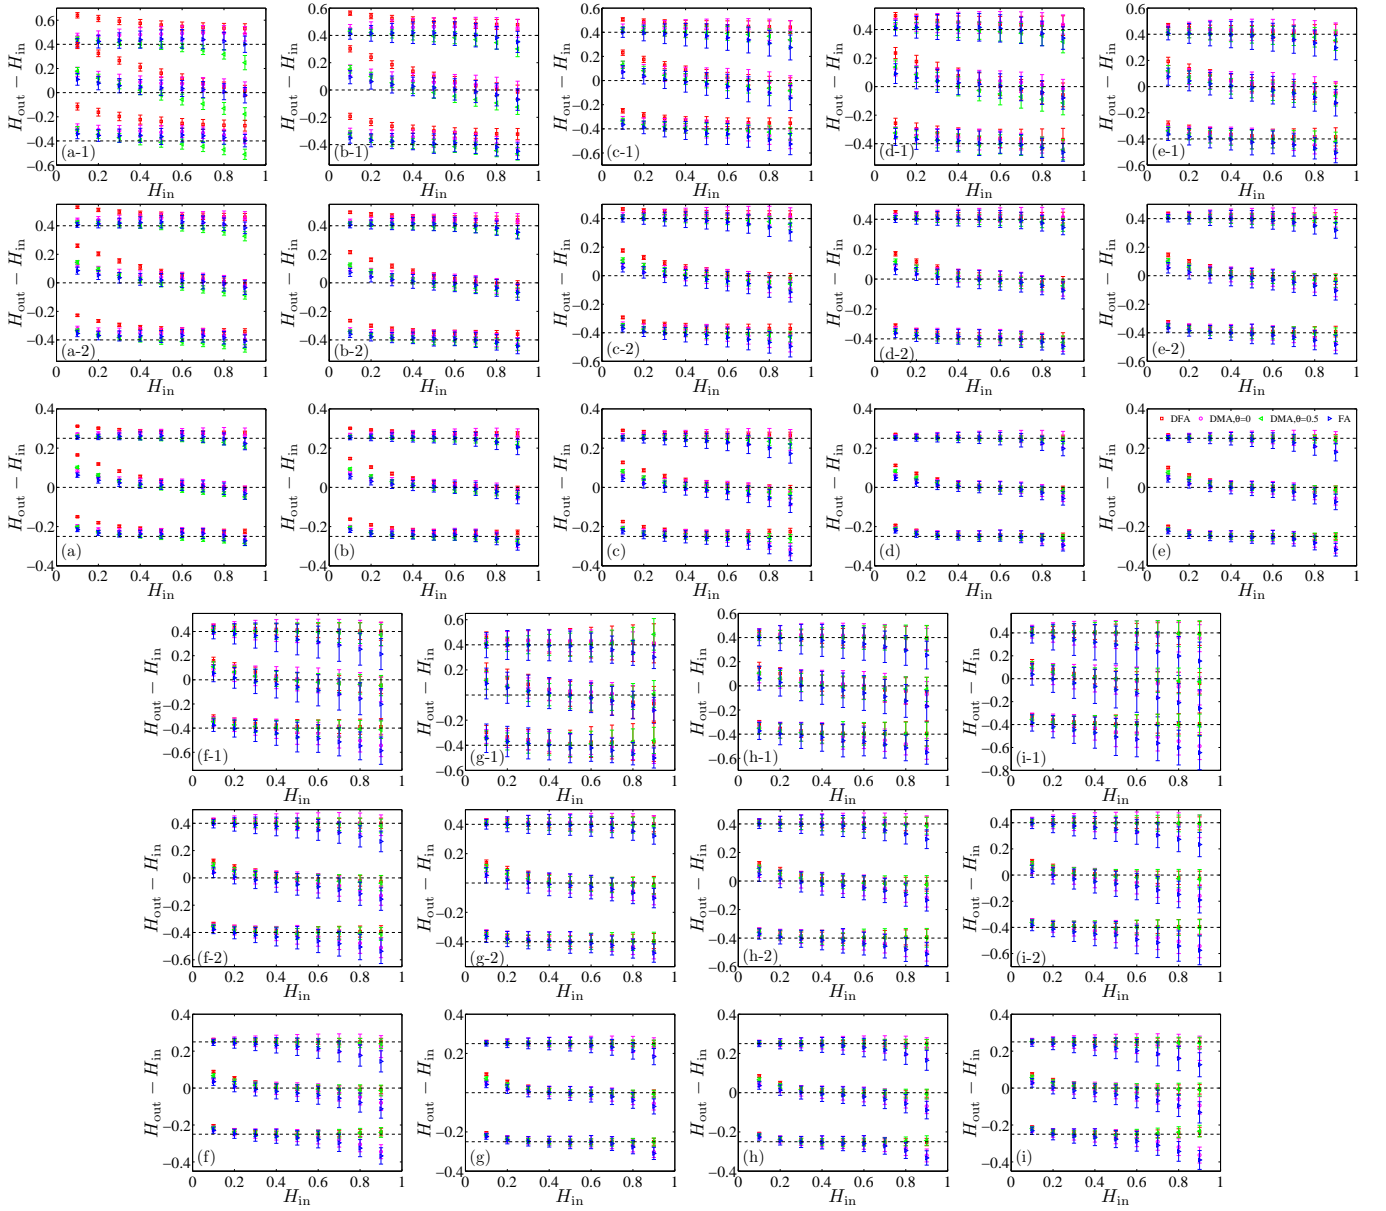

FIG. 3. Comparing impacts of the scaling range on the Hurst index estimates. The plots labeled (a)-(o) are the same as in the paper where the length of time series is 20000, the plots labeled with (a-1) to (o-1) are the results where the length of time series is 500, and the plots labeled with (a-2) to (o-2) are the results where the length of time series is 2000.
